# Supplementary material for: Topological derivation from centrosymmetry to noncentrosymmetry in a three-dimensional polar framework material
Source: Royal Society of Chemistry journal article supplement (doi:10.1039/b915001c), 2009-10-12
Supplement: b915001c.pdf [file b915001c.pdf]

Supporting Information:

## Topological Derivation from Centrosymmetry to Noncentrosymmetry in a Three-dimensional Polar Framework Material

Fei Wang, Jian Zhang, Shu-Mei Chen, Xiao-Yuan Wu, Shan-Ci Chen, Yi-Ming Xie,  
Wei-Wei Zhou, Can-Zhong Lu \*

*State Key Laboratory of Structural Chemistry, Fujian Institute of Research on the Structure of Matter, Chinese Academy of Sciences, Fuzhou, Fujian, 35002, China. E-mail: czlu@fjirsm.ac.cn*

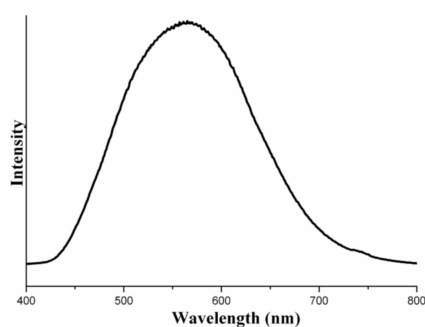

**Fig. s1** Emission spectrum of compound **1** measured in the solid state at room temperature.

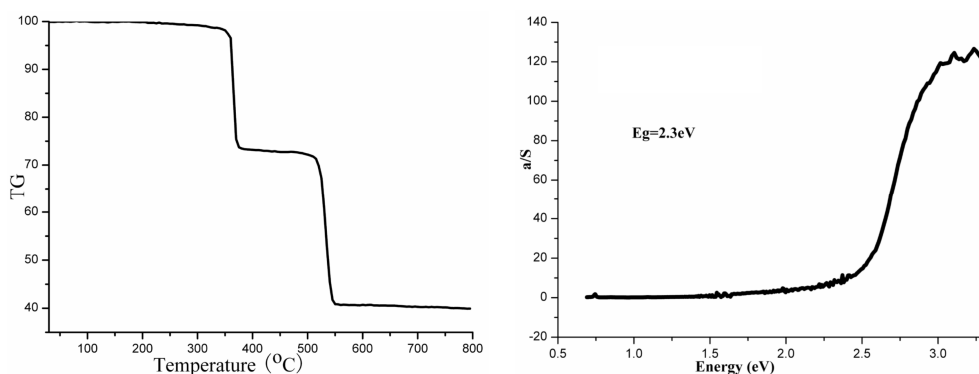

**Fig. s2** The TG Plot for **1** under  $\text{N}_2$  atmosphere. **Fig. s3** The Diffuse reflectance spectrum of **1**.

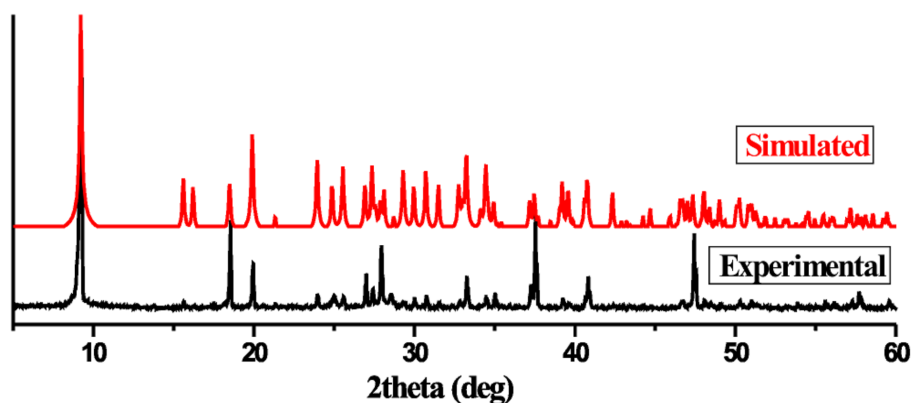

Fig. s4 The powder X-ray diffraction patterns of **1**.

### Topological analysis performed on TOPOS program

Topology for ZD1

-----  
 Atom ZD1 links by bridge ligands and has

| Common vertex with |        |         |                | R(A-A) | f Total SA |
|--------------------|--------|---------|----------------|--------|------------|
| ZE 1               | 0.7631 | 0.5047  | 0.8187 (0 0 0) | 2.536A | 1 35.81    |
| ZE 1               | 0.7631 | -0.4953 | 0.8187 (0-1 0) | 2.589A | 1 33.21    |
| ZE 2               | 0.8585 | -0.3595 | 0.6382 (0 0 0) | 2.611A | 1 30.98    |

Topology for ZE1

-----  
 Atom ZE1 links by bridge ligands and has

| Common vertex with |        |        |                | R(A-A) | f Total SA |
|--------------------|--------|--------|----------------|--------|------------|
| ZD 1               | 0.8513 | 0.0142 | 0.8232 (0 0 0) | 2.536A | 1 21.17    |
| ZD 1               | 0.8513 | 1.0142 | 0.8232 (0 1 0) | 2.589A | 1 19.63    |
| ZF 1               | 0.6089 | 0.3189 | 0.5823 (0 1 0) | 3.674A | 1 27.58    |
| ZF 1               | 0.6089 | 0.6811 | 1.0823 (0 0 1) | 4.839A | 1 31.61    |

Topology for ZE2

-----  
 Atom ZE2 links by bridge ligands and has

| Common vertex with |        |         |                | R(A-A) | f Total SA |
|--------------------|--------|---------|----------------|--------|------------|
| ZD 1               | 0.8513 | -0.0142 | 0.3232 (0 0-1) | 2.611A | 1 23.06    |
| ZF 1               | 0.6089 | 0.6811  | 0.0823 (0 0 0) | 4.965A | 1 40.67    |
| ZF 1               | 1.1089 | 0.1811  | 0.0823 (0-1 0) | 5.168A | 1 36.27    |

Topology for ZF1

-----

Atom ZF1 links by bridge ligands and has

| Common vertex with |        |        |         |          | R(A-A) | f | Total SA |
|--------------------|--------|--------|---------|----------|--------|---|----------|
| ZE 1               | 0.7631 | 0.4953 | 0.3187  | ( 0 1-1) | 3.674A | 1 | 22.93    |
| ZE 1               | 0.7631 | 0.5047 | -0.1813 | ( 0 0-1) | 4.839A | 1 | 26.28    |
| ZE 2               | 0.8585 | 0.3595 | 0.1382  | ( 0 0 0) | 4.965A | 1 | 26.84    |
| ZE 2               | 0.3585 | 0.8595 | 0.1382  | (-1 0 0) | 5.168A | 1 | 23.94    |

-----

Structural group analysis

-----

-----

Structural group No 1

-----

Structure consists of 3D framework with ZFZE2ZD

Coordination sequences

-----

ZD1: 1 2 3 4 5 6 7 8 9 10  
Num 3 7 17 34 55 82 118 160 210 265  
Cum 4 11 28 62 117 199 317 477 687 952

-----

ZE1: 1 2 3 4 5 6 7 8 9 10  
Num 4 9 19 36 58 87 125 166 219 273  
Cum 5 14 33 69 127 214 339 505 724 997

-----

ZE2: 1 2 3 4 5 6 7 8 9 10  
Num 3 7 17 34 58 85 122 164 214 269  
Cum 4 11 28 62 120 205 327 491 705 974

-----

ZF1: 1 2 3 4 5 6 7 8 9 10  
Num 4 9 19 38 61 92 129 172 223 279  
Cum 5 14 33 71 132 224 353 525 748 1027

-----

TD10=987

Vertex symbols for selected sublattice

-----  
ZD1 Schlafli symbol: {4;8<sup>2</sup>}

With circuits:[4.8(2).8(3)]  
-----

ZE1 Schlafli symbol: {4;8<sup>4</sup>;10}

With circuits:[4.8(3).8.10(5).8(2).8(2)]  
-----

ZE2 Schlafli symbol: {4;8<sup>2</sup>}

With circuits:[4.8.8]  
-----

ZF1 Schlafli symbol: {4;8<sup>4</sup>;10}

With circuits:[4.8.8.8(2).8(3).10(3)]  
-----

Total Schlafli symbol: {4;8<sup>2</sup>} {4;8<sup>4</sup>;10}

3,4-c net with stoichiometry (3-c)(4-c); 4-nodal net

New topology, please, contact the authors (23744 types in 6 databases).

### Topological analysis performed on Systre program

Structure #1 - "wfl".

Structure of dimension 3.

Given space group is Cc.

8 nodes and 14 edges in repeat unit as given.

Given repeat unit is accurate.

Point group has 2 elements.

4 kinds of node.

Coordination sequences:

Node Br1: 3 7 17 34 55 82 118 160 210 265

Node Sc1: 4 9 19 38 61 92 129 172 223 279

Node Cu2: 4 9 19 36 58 87 125 166 219 273

Node Cu1: 3 7 17 34 58 85 122 164 214 269

TD10 = 987.5000

Ideal space group is C1c1.

Structure is new for this run.

Relaxed cell parameters:

a = 3.46782, b = 1.96814, c = 3.97203

alpha = 90.0000, beta = 95.0272, gamma = 90.0000

Cell volume: 27.00541

Relaxed positions:

Node Br1: 0.04256 0.02957 0.33002

Node Sc1: 0.48281 0.02456 0.04138

Node Cu2: 0.50976 0.02946 0.29426

Node Cu1: 0.22229 0.19919 0.52140

Edges:

0.04256 0.02957 0.33002 <-> 0.00976 -0.47054 0.29426

0.04256 0.02957 0.33002 <-> 0.22229 0.19919 0.52140

0.48281 0.02456 0.04138 <-> 0.22229 -0.19919 0.02140

0.48281 0.02456 0.04138 <-> 0.72229 0.30081 0.02140

0.48281 0.02456 0.04138 <-> 0.50976 0.02946 0.29426

0.48281 0.02456 0.04138 <-> 0.50976 -0.02946 -0.20574

0.04256 0.02957 0.33002 <-> 0.00976 0.52946 0.29426

Edge centers:

0.02616 -0.22049 0.31214

0.13243 0.11438 0.42571

0.35255 -0.08731 0.03139

0.60255 0.16269 0.03139

0.49628 0.02701 0.16782

0.49628 -0.00245 -0.08218

0.02616 0.27951 0.31214

Edge statistics: minimum = 0.99739, maximum = 1.00191, average = 1.00000

Angle statistics: minimum = 76.99411, maximum = 168.66428, average = 117.09819

Shortest non-bonded distance = 1.24431

Degrees of freedom: 14

Finished structure #1 - "wfl".
